# Supplementary material
Source: publisher figshare collection journal article supplement (https://acs.figshare.com/ndownloader/files/5829327)

## Supplementary Information

### Methyl 2,3,4 tri-O-acetyl 6-deoxy- $\alpha$ -D-xylohex-5-enopyranoside (3)

Triphenylphosphine (31.3 g, 0.123 mol), iodine (30.5 g, 0.123 mol) and imidazole (24.5 g, 0.36 mol) were added to a solution of methyl  $\alpha$ -D-glucopyranoside (20 g, 0.1 mol) in toluene (200 mL) at 70°C. The reaction mixture was stirred for 2 h after which time the starting material had been consumed ( $R_f$  = 0.6, 1:3 methanol:ethyl acetate) and then cooled to room temperature. Water (200 mL) was added and the mixture was stirred vigorously for 15 minutes. The layers were separated and the toluene phase was further extracted with H<sub>2</sub>O until no product remained in the organic phase (checked by TLC). The combined H<sub>2</sub>O extracts were concentrated under vacuum and toluene was evaporated from the residue. The residue was dissolved in pyridine (200 mL). The mixture was cooled to 0°C and chlorotrimethylsilane (80 mL, 0.4 mol) was added. The reaction mixture was allowed to warm to room temperature and stirred for 2 h. Water and diethyl ether were added and the layers separated. The aqueous layer was further washed with diethyl ether. The ether extracts were combined and washed with water, dried using anhydrous sodium sulfate and the solvent was removed under vacuum. The residue was dissolved in dry DMF (200 mL) and DBU (80 mL, 0.5 mol) was added and the mixture stirred under N<sub>2</sub> for 3 h at 75°C. Partial desilylation can occur (slower moving spots appear on the TLC using 1:10 ethyl acetate:petroleum spirits). The reaction mixture was cooled to room temperature. Acetic anhydride (100 mL) and pyridine (100 mL) were added to the reaction flask and the mixture left overnight. Water and ethyl acetate were added and layers separated and the aqueous layer was further extracted with ethyl acetate. The combined organic extracts were washed with NaHCO<sub>3</sub> and water, dried (MgSO<sub>4</sub>) and concentrated. The residue was eluted from a column of silica gel with 1:4 ethyl acetate:petroleum spirits (b.p 40-60°) containing 0.1% of triethylamine to give the title compound as a white solid (22.9 g, 61%):  $[\alpha]_D^{20}$  +109.8 (c 1.0, CHCl<sub>3</sub>); m. pt. 98-99 °C (lit.,<sup>7</sup> m. pt. >100°C).

### Methyl 2,3,4 tri-O-benzyl-6-deoxy- $\alpha$ -D-xylohex-5-enopyranoside (4)

A catalytic quantity of NaOMe solution (prepared by dissolving 0.3 g Na in 50 mL methanol) was added to a solution of **3** (22.9 g, 0.06 mol) in methanol (300 mL) and the mixture stirred at room temperature until a product ( $R_f$  = 0.4, 1:3 MeOH:EtOAc) had formed. The solvent was removed and the product dried under vacuum (0.5 mmHg, 10.7 g, 100%). The residue (5.0 g, 0.028 mol) was dissolved in DMF (50 mL) and sodium hydride (60% dispersion in mineral oil, 4.5 g, 0.113 mol) was added and the mixture was cooled to 0°C. Benzyl bromide (13.5 mL, 0.133 mol) was then added dropwise over 30 minutes to this mixture. The reaction was quenched after 1.5 h by addition of methanol and further diluted with H<sub>2</sub>O. The product was extracted with EtOAc and the combined organic extracts washed with H<sub>2</sub>O, dried (MgSO<sub>4</sub>) and solvent removed. The product was purified by chromatography with (silica gel, 1:4 EtOAc:petroleum spirits (b.p 40-60°) as eluent to give the title compound (8.54 g, 68%):  $[\alpha]_D^{20}$  -28.8 (c 1.0, CHCl<sub>3</sub>); m. pt. 47.5-49 °C. The <sup>1</sup>H-NMR spectroscopic data is in good agreement with those previously reported.<sup>7</sup>

**Spectroscopic data for 5:**

Clear syrup;  $[\alpha]_D^{20} +34.8$  (c 0.046,  $\text{CHCl}_3$ );  $^1\text{H-NMR}$  ( $\text{CDCl}_3$ , 270 MHz)  $\delta$  5.46 (d, 1H,  $J_{1-2} = 2.0$ , H-1), 5.40 (appt, 1H  $J_{3-4} = J_{2-3} = 8.5$ , H-3), 5.14 (dd, 1H,  $J_{6a-4} = 2.0$ ,  $J_{3-4} = 8.5$ , H-4), 4.60 (br s, OH), 4.91 (dd, 1H,  $J_{2-1} = 2.0$ ,  $J_{2-3} = 8.5$ , H-2), 4.16 (d, 1H,  $J_{6a-6b} = 8.5$ , H-6b), 3.51 (dd, 1H,  $J_{4-6a} = 2.0$ ,  $J_{6b-6a} = 8.5$ , H-6a), 2.04, 2.08 and 2.12 (each s, each 3H, OAc) ppm;  $^{13}\text{C NMR}$   $\delta$  173.1 (C=O), 170.9 (C=O), 170.6 (C=O), 103.1 (C-5), 99.0 (C-1), 74.7 (C-2), 74.6 (C-4), 74.5 (C-2), 70.7 (C-6), 21.4, 21.3 (2 signals) (each OAc); IR (liquid film)  $\nu$  3379, 2917, 1731, 1369, 1225 and 1041  $\text{cm}^{-1}$ .

**Spectroscopic data for 6:**

White solid;  $[\alpha]_D^{20} +34.5$  (c 1.0,  $\text{CHCl}_3$ ); m. pt. 98-99 °C;  $^1\text{H NMR}$  ( $\text{CDCl}_3$ , 270 MHz)  $\delta$  7.22-7.34 (m, 15H, phenyl), 5.26 (d, 1H,  $J_{1-2} = 2.0$ , H-1), 4.61-4.94 (m, 6H,  $\text{CH}_2$ , benzyl), 4.19 (d, 1H,  $J_{6a-6b} = 8.0$ , H-6a), 3.79 (appt, 1H,  $J_{3-4} = J_{2-3} = 8.0$ , H-3), 3.68 (dd, 1H,  $J_{6a-4} = 2.0$ ,  $J_{3-4} = 8.0$ , H-4), 3.53 (dd, 1H,  $J_{2-1} = 2.0$ ,  $J_{2-3} = 8.0$ , H-2), 3.31 (dd, 1H,  $J_{6b-4} = 2.0$ ,  $J_{6a-6b} = 8.0$ , H-6b);  $^{13}\text{C NMR}$   $\delta$  138.4, 138.2, 137.7 (each s), 128.8-127.7 (18C aromatic, each d), 103.5 (C-5), 98.4 (C-1), 82.6 (C-2), 82.0 (2s, C-3 and C-4), 75.6, 74.7 and 73.0 (each t), 68.5 (C-6); IR (solution in  $\text{CHCl}_3$ )  $\nu$  3356, 2323, 1453, 1344, 1208, 1067, 1003, 836 and 754  $\text{cm}^{-1}$ . HRCI-MS Found: 466.2229. Calcd. for  $\text{C}_{27}\text{H}_{32}\text{O}_6\text{N}$  ( $\text{M}+\text{NH}_4$ ): 466.2291.

**Spectroscopic data for 13a**

Clear syrup;  $[\alpha]_D^{20} +17.4$  (c 0.26,  $\text{CHCl}_3$ );  $^1\text{H NMR}$  ( $\text{CDCl}_3$ , 500 MHz)  $\delta$  7.18-7.28 (m, 15H, phenyl), 5.18 (d, 1H,  $J_{1-2} = 2.0$ , H-1), 4.83-4.56 (m, 6H,  $\text{CH}_2$ , benzyl), 3.93 (d, 1H,  $J_{6a-6b} = 8.0$ , H-6a), 3.71 (1H, appt,  $J_{3-4} = J_{2-3} = 8.0$ , H-3), 3.68 (1H, dd,  $J_{4-6b} = 2.0$ ,  $J_{3-4} = 8.0$ , H-4), 3.56 (dd, 1H,  $J_{6b-4} = 2.0$ ,  $J_{6a-6b} = 8.0$ , H-6b), 3.47 (dd, 1H,  $J_{1-2} = 2.0$ ,  $J_{2-3} = 8.0$ , H-2), 3.42 (s, 3H,  $\text{OCH}_3$ );  $^{13}\text{C NMR}$  138.5 (2 signals) and 137.9 (each s), 129.6-127.6 (18C, aromatic C, each d), 106.3 (C-5), 98.3 (C-1), 82.7 (C-2), 82.3 (C-3), 81.3 (C-4), 75.5, 74.4 and 73.0 (each t), 63.5 (C-6), 50.6 (q). IR (liquid film)  $\nu$  1651, 1453, 1365, 1260 and 1098  $\text{cm}^{-1}$ . HRCI-MS: Found: 480.2386. Calcd. for  $\text{C}_{28}\text{H}_{34}\text{O}_6\text{N}$  ( $\text{M}+\text{NH}_4$ ): 480.2387.

**Spectroscopic data for 13b**

Clear syrup;  $[\alpha]_D^{20} +12.8$  (c 0.25,  $\text{CHCl}_3$ );  $^1\text{H NMR}$  ( $\text{CDCl}_3$ , 300 MHz): 7.20-7.35 (m, 15H, phenyl), 5.39 (d, 1H,  $J_{1-2} = 2.0$ , H-1), 4.60-4.94 (m, 6H, benzyl  $\text{CH}_2$ ), 4.31 (d, 1H,  $J_{6a-6b} = 8.0$ , H-6b), 4.20 (dd, 1H,  $J_{6a-4} = 2.0$ ,  $J_{3-4} = 8.0$ , H-4), 3.90 (dd, 1H,  $J_{6a-6b} = 8.0$ ,  $J_{6a-4} = 2.0$ , H-6a), 3.75 (appt, 1H,  $J_{3-4} = 8.0 = J_{2-3}$ , H-3), 3.59 (dd, 1H,  $J_{1-2} = 2.0$ ,  $J_{2-3} = 8.0$ , H-2), 3.15 (s, 3H, mesyl  $\text{CH}_3$ );  $^{13}\text{C NMR}$   $\delta$  138.5, 138.0 and 138.9 (each s), 128.9-128.0 (18C, aromatic C, each d), 108.1 (C-5), 100.4 (C-1), 82.9 (C-2), 82.5 (C-3), 82.3 (C-4), 75.9, 75.3 and 73.5 (each t), 68.4 (C-6), 42.15 (q); IR  $\nu$  2952, 1454, 1371, 1191, 1069, 787  $\text{cm}^{-1}$ . HRCI-MS: Found: 544.2002. Calcd. for  $\text{C}_{28}\text{H}_{34}\text{O}_8\text{NS}$  ( $\text{M}+\text{NH}_4$ ): 544.2005.

**Spectroscopic data for 13c**

Clear syrup;  $[\alpha]_D^{20} +27.9$  (c 0.07,  $\text{CHCl}_3$ );  $^1\text{H NMR}$  ( $\text{CDCl}_3$ , 270 MHz)  $\delta$  7.25-7.32 (m, 15H, phenyl), 5.42 (d, 1H,  $J_{1-2} = 2.0$ , H-1), 4.87-4.56 (m, 6H, benzyl  $\text{CH}_2$ ), 4.37 (d, 1H,  $J_{6a-6b} = 8.0$ , H-6b), 4.08 (dd, 1H,  $J_{6a-4} = 2.0$ ,  $J_{3-4} = 8.0$ , H-4), 3.94 (dd, 1H,  $J_{4-6a} = 2.0$ ,  $J_{6b-6a} = 8.0$ , H-6a), 3.78 (appt, 1H,  $J_{3-4} = 8.0$ , H-3), 3.63 (dd, 1H,  $J_{1-2} = 2.0$ ,  $J_{2-3} = 8.0$ , H-2);  $^{13}\text{C NMR}$   $\delta$  137.8, 137.3 and 137.0 (each s), 128.7-127.8 (18C, aromatic C, each d), 111.0 (C-5), 100.1 (C-1), 82.1 (C-2), 82.0 (C-3), 81.5 (C-4), 75.6, 75.3 and

73.3 (each t), 67.5 (C-6); IR (liquid film)  $\nu$  2922, 1601, 1420, 1215, 1091, 799  $\text{cm}^{-1}$ . HRCI-MS: Found: 598.1722 Calcd. for  $\text{C}_{28}\text{H}_{31}\text{F}_3\text{O}_8\text{NS}$  (M +  $\text{NH}_4$ ): 598.1728.

#### Spectroscopic data for 13d

Clear syrup  $[\alpha]_{\text{D}}^{20} +15.4$  (c1.0,  $\text{CHCl}_3$ );  $^1\text{H}$  NMR ( $\text{CDCl}_3$ , 270 MHz),  $\delta$  7.23-7.13 (m, 15H, phenyl), 5.23 (d, 1H,  $J_{1-2} = 2.0$ , H-1), 4.91-4.55 (m, 6H, benzyl  $\text{CH}_2$ ), 4.10 (d, 1H,  $J_{6a-6b} = 8.0$ , H-6b), 3.65 (appt, 1H,  $J_{2-3} = J_{3-4} = 8.0$ , H-3), 3.53 (dd, 1H,  $J_{6a-4} = 2.0$ ,  $J_{3-4} = 8.0$ , H-4), 3.45 (dd, 1H,  $J_{1-2} = 2.0$ ,  $J_{2-3} = 8.0$ , H-2), 3.31 (dd, 1H,  $J_{6b-4} = 2.0$ ,  $J_{6a-6b} = 8.0$ , H-6b), 0.82 (s, 9H, *t*-butyl), 0.09 (s, 6H,  $\text{Si}(\text{CH}_3)_2\text{C}(\text{CH}_3)_3$ );  $^{13}\text{C}$ -NMR  $\delta$  139.0 (2 signals) and 138.4 (each s), 128.9-128.0 (18C, aromatic C, each d), 105.1 (C-5), 98.8 (C-1), 84.9 (C-2), 82.9 (C-3), 82.4 (C-4), 76.0, 75.3, and 73.4 (each t), 73.3 (C-6), 26.2 ( $\text{C}(\text{CH}_3)_3$ ), 18.3 ( $\text{C}(\text{CH}_3)_3$ ), 1.44 and 0.43 ( $\text{Si}(\text{CH}_3)_2\text{C}(\text{CH}_3)_3$ ); IR (liquid film)  $\nu$  2928, 1454, 1364, 1274, 1205, 1091, 859  $\text{cm}^{-1}$ . HRCI-MS: Found: 580.3094. Calcd. for  $\text{C}_{33}\text{H}_{46}\text{O}_6\text{SiN}$  (M +  $\text{NH}_4$ ): 580.3101.

#### Spectroscopic data for 13e

Clear syrup?  $[\alpha]_{\text{D}}^{20} +42.3$  (c.1.0  $\text{CHCl}_3$ )  
 $^1\text{H}$  NMR ( $\text{CDCl}_3$ , 270 MHz),  $\delta$  7.31-7.24 (m, 15H, phenyl), 5.35 (d, 1H,  $J_{1-2} = 2.0$ , H-1), 4.89-4.62 (m, 6H, benzyl  $\text{CH}_2$ ), 4.35 (d, 1H,  $J_{6a-6b} = 8.0$ , H-6a), 4.31 (dd, 1H,  $J_{6a-4} = 2.0$ ,  $J_{3-4} = 8.0$ , H-4), 3.83 (appt, 1H,  $J_{3-4} = J_{2-3} = 8.0$ , H-3), 3.80 (dd, 1H,  $J_{6b-4} = 2.0$ ,  $J_{6a-6b} = 8.0$ , H-6b), 3.63 (dd, 1H,  $J_{1-2} = 2.0$ ,  $J_{2-3} = 8.0$ , H-2), 2.00 (s, 3H, OAc);  $^{13}\text{C}$  NMR 168.0 (C=O), 138.3, 138.0 and 137.7 (each s), 128.6-127.7 (18C, aromatic C, each d), 104.2 (C-5), 99.3 (C-1), 82.5 (C-2), 82.4 (C-3), 80.4 (C-4), 75.5, 74.9 and 73.1 (each t), 68.1 (C-6), 21.6 (q). IR (liquid film)  $\nu$  2923, 1761, 1454, 1363, 1219, 1074, 737  $\text{cm}^{-1}$ . HRCI-MS: 508.2335. Calcd. for  $\text{C}_{29}\text{H}_{34}\text{O}_7\text{N}$  (M +  $\text{NH}_4$ ): 508.2346.

#### Spectroscopic data for 18

Clear syrup;  $[\alpha]_{\text{D}}^{20} +14.2$  (c 0.8,  $\text{CHCl}_3$ );  $^1\text{H}$  NMR ( $\text{CDCl}_3$ , 270 MHz)  $\delta$  7.32-7.27 (m, 15, phenyl), 5.28 (d, 1H,  $J_{1-2} = 2.0$ , H-1), 4.72 (m, 6H, benzyl  $\text{CH}_2$ ), 3.99 (d, 1H, dd,  $J_{6b-6a} = 9.0$ , H-6b), 3.99 (dd, 1H,  $J_{6a-4} = 1.0$ ,  $J_{3-4} = 9.0$ , H-4), 3.73 (dd, 1H,  $J_{2-3} = 4.5$ ,  $J_{3-4} = 9.0$ , H-3), 3.66 (dd, 1H,  $J_{1-2} = 2.0$ ,  $J_{2-3} = 4.5$ , H-2), 3.24 (dd, 1H,  $J_{6a-4} = 1.0$ ,  $J_{6b-6a} = 9.0$ , H-6a);  $^{13}\text{C}$ -NMR: 138.5, 138.0 and 137.8 (each q), 128.8-127.5 (18 signals, aromatic C, each d), 102.6 (C-5), 99.4 (C-1), 81.4 (C-4), 78.5 (C-3), 75.0 (C-2), 75.2, 73.1 and 73.0 (each t), 66.9 (C-6); IR (liquid film)  $\nu$  3421, 2929, 1454, 1364, 1260, 1112, 799, 697  $\text{cm}^{-1}$ . HRCI-MS: 466.2220. Calcd. for  $\text{C}_{27}\text{H}_{32}\text{O}_6\text{N}$  (M +  $\text{NH}_4$ ): 466.2230.

2D-NOESY for 13d

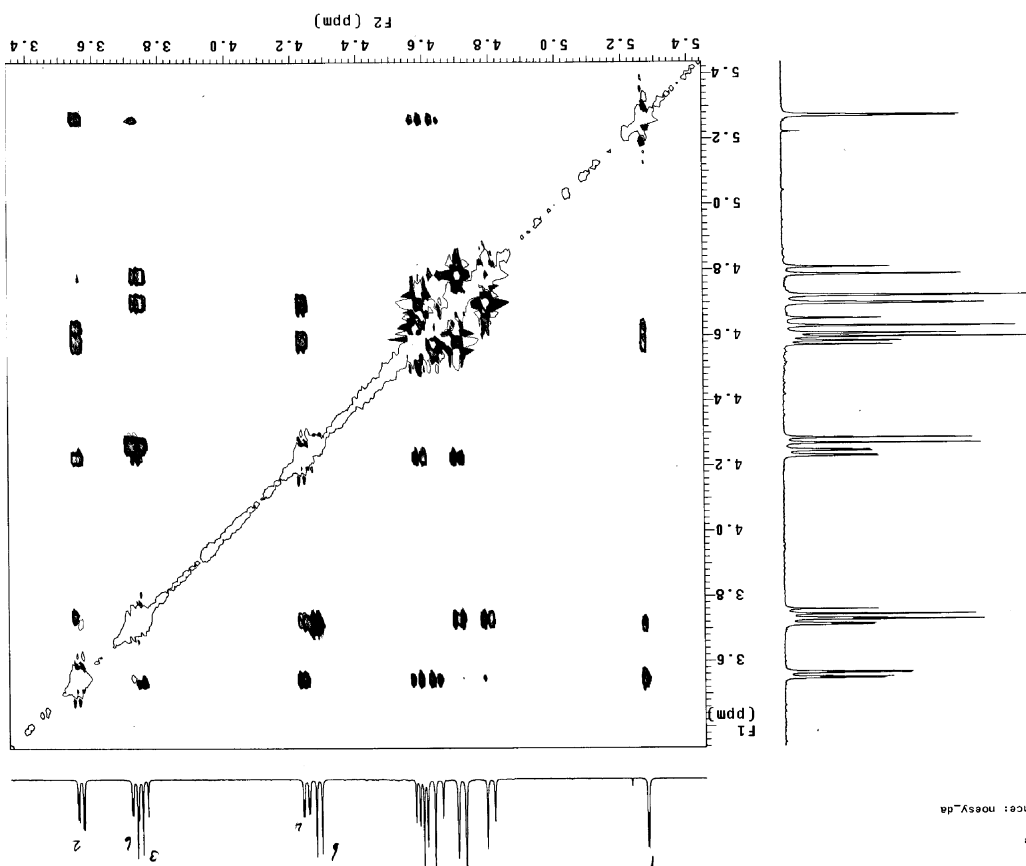

2D-NOESY of 18

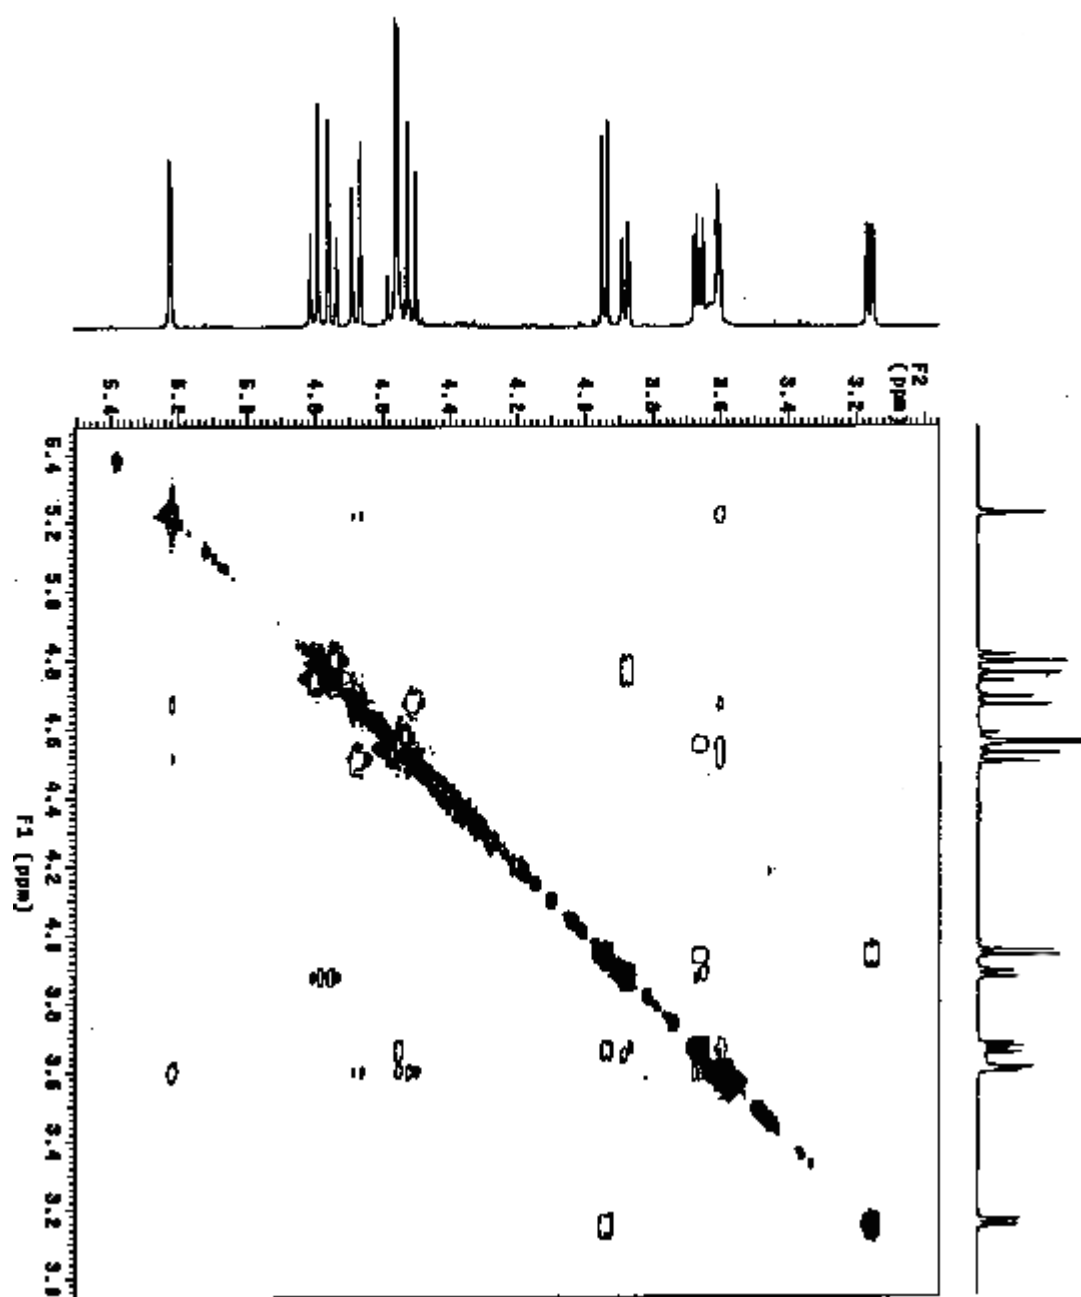

2D-NOESY for **5**

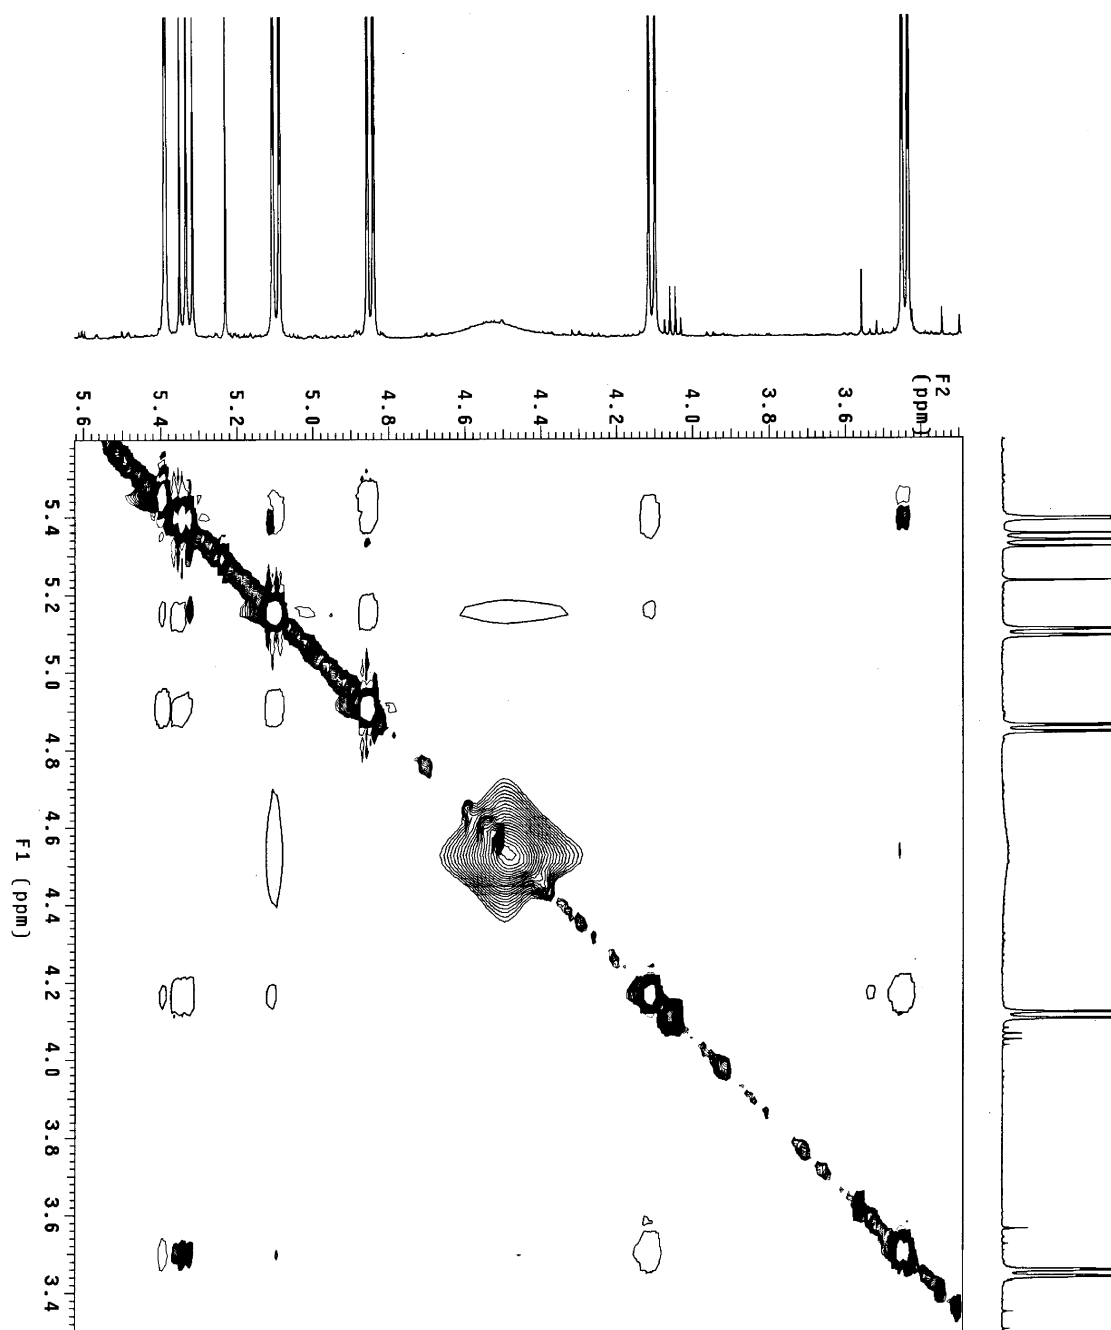

## 2D-NOESY for 6

Hexulose  
P.Enr1ght  
Pulse Sequence: noesy\_da

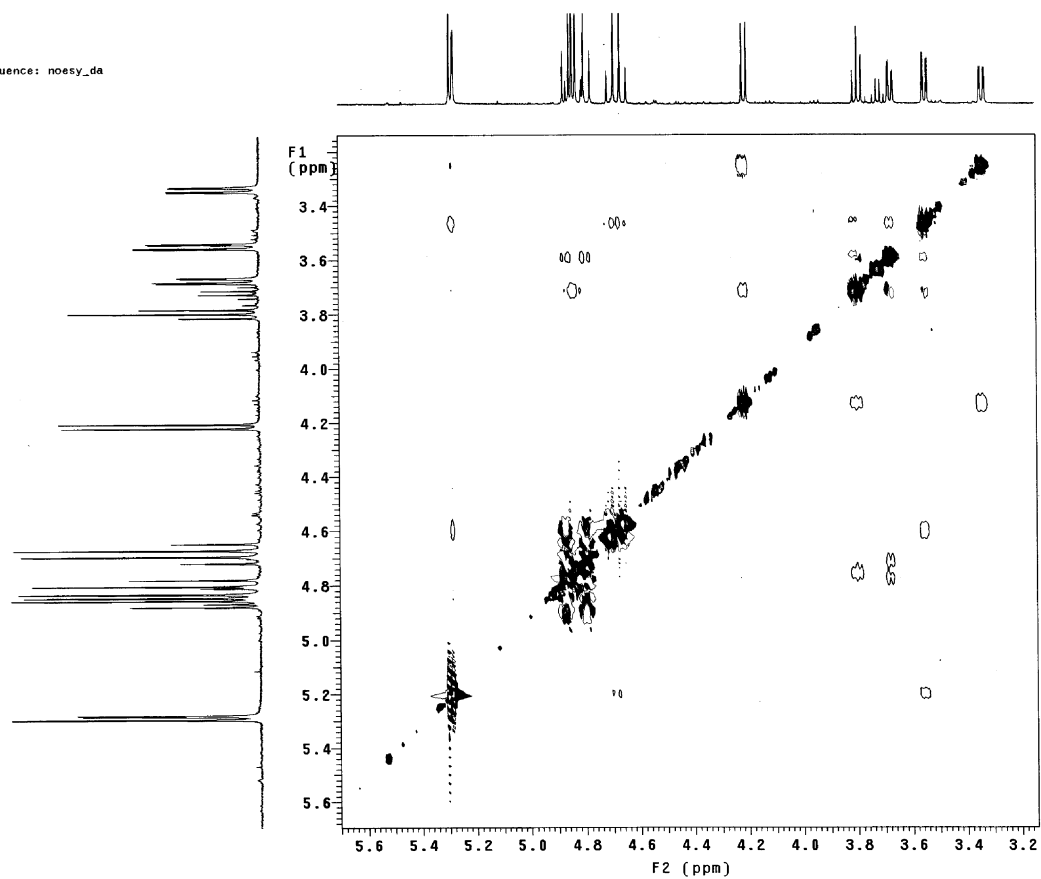

$^{13}\text{C}$ -NMR of **15** (60-110 ppm)

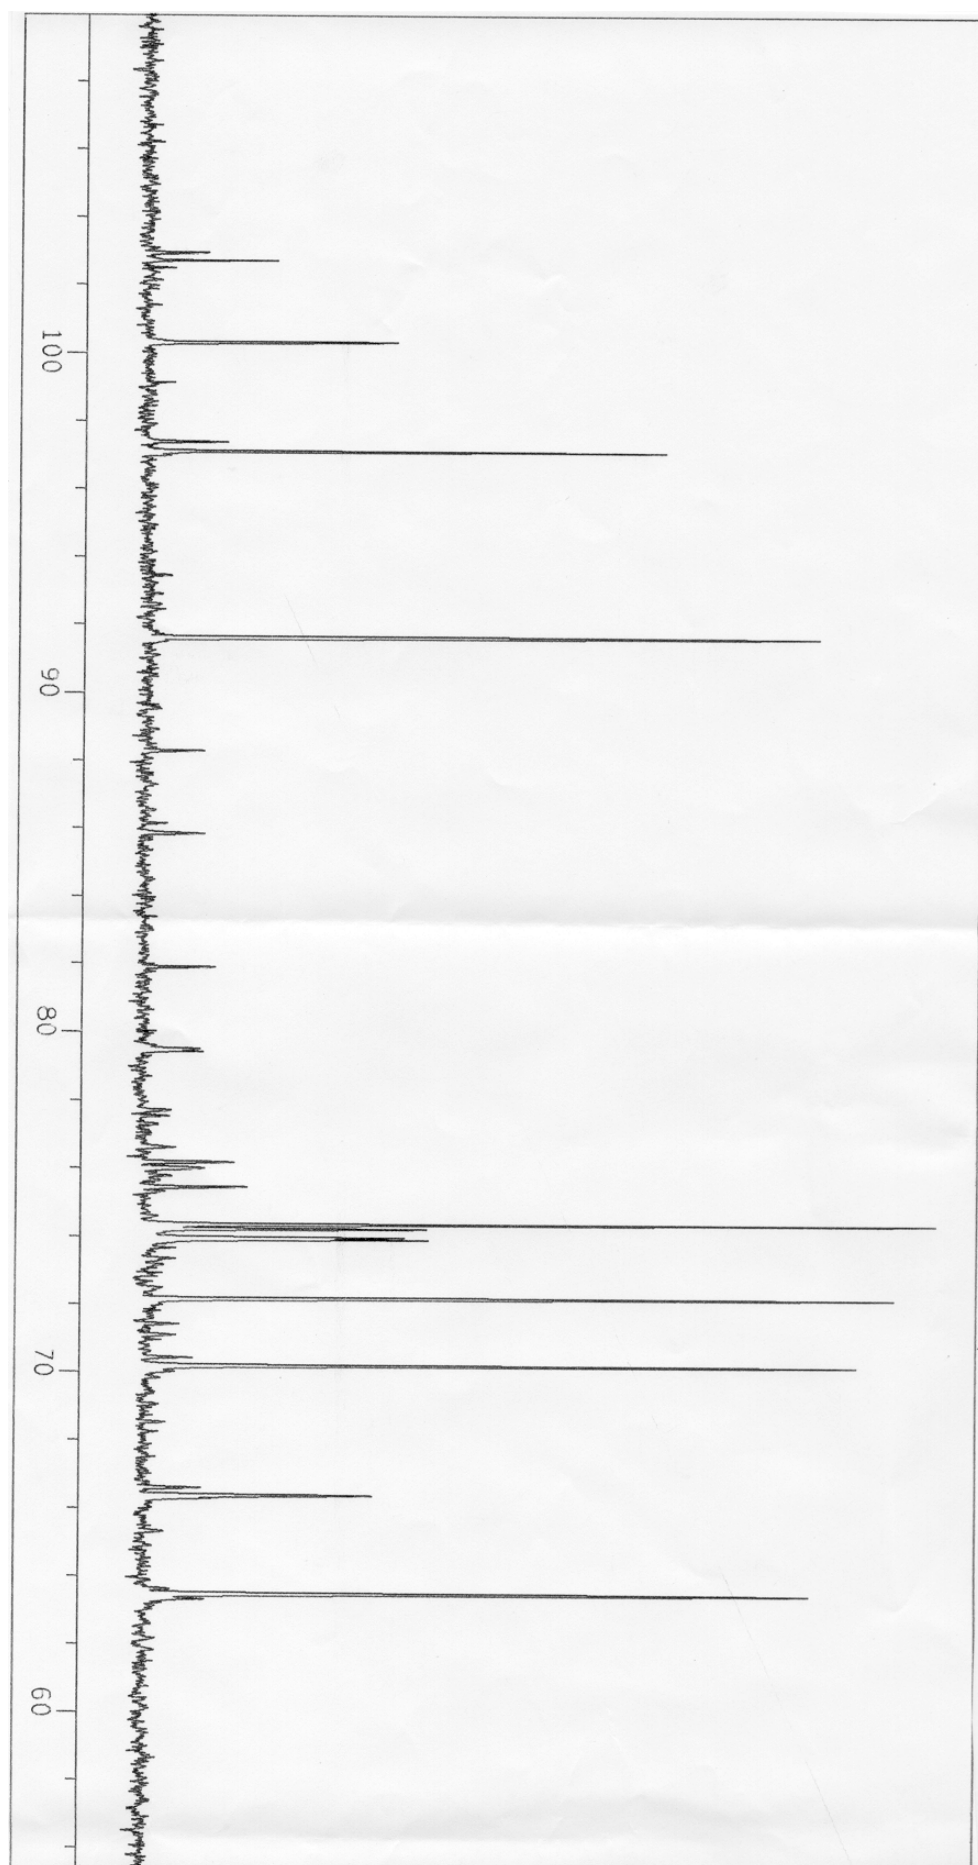



$^{13}\text{C}$ -NMR 15 (200-230 ppm)

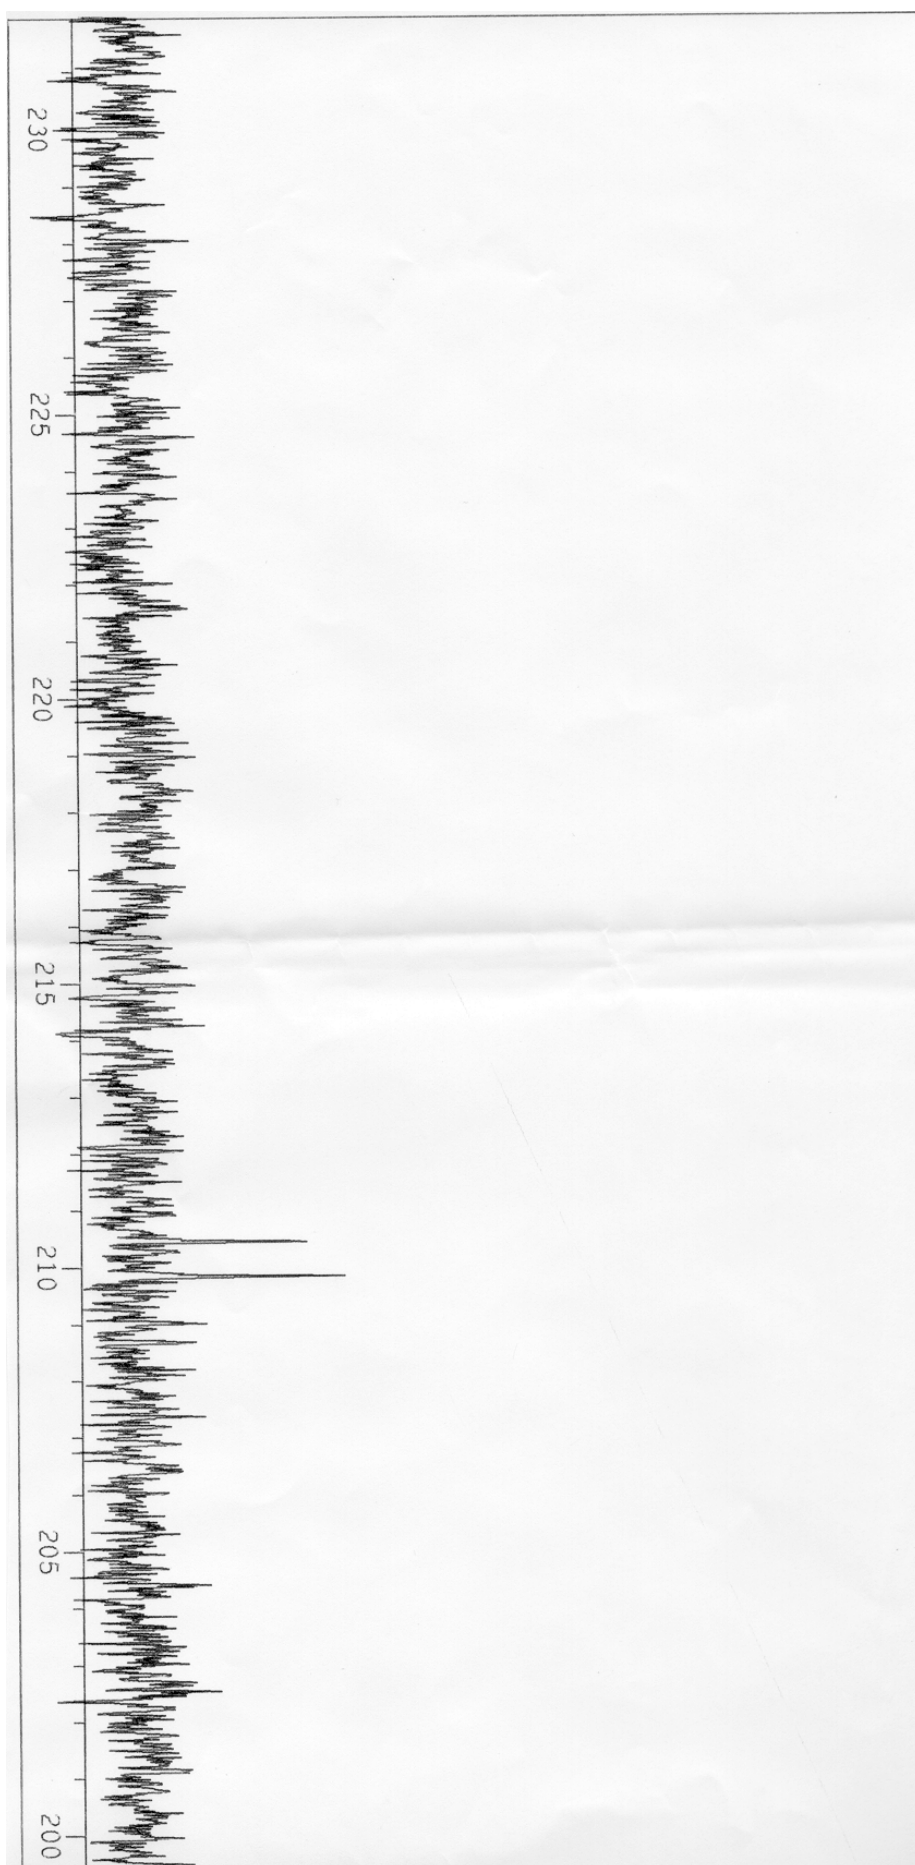

$^1\text{H}$ -NMR spectrum for **15** (500MHz,  $\text{D}_2\text{O}$ )

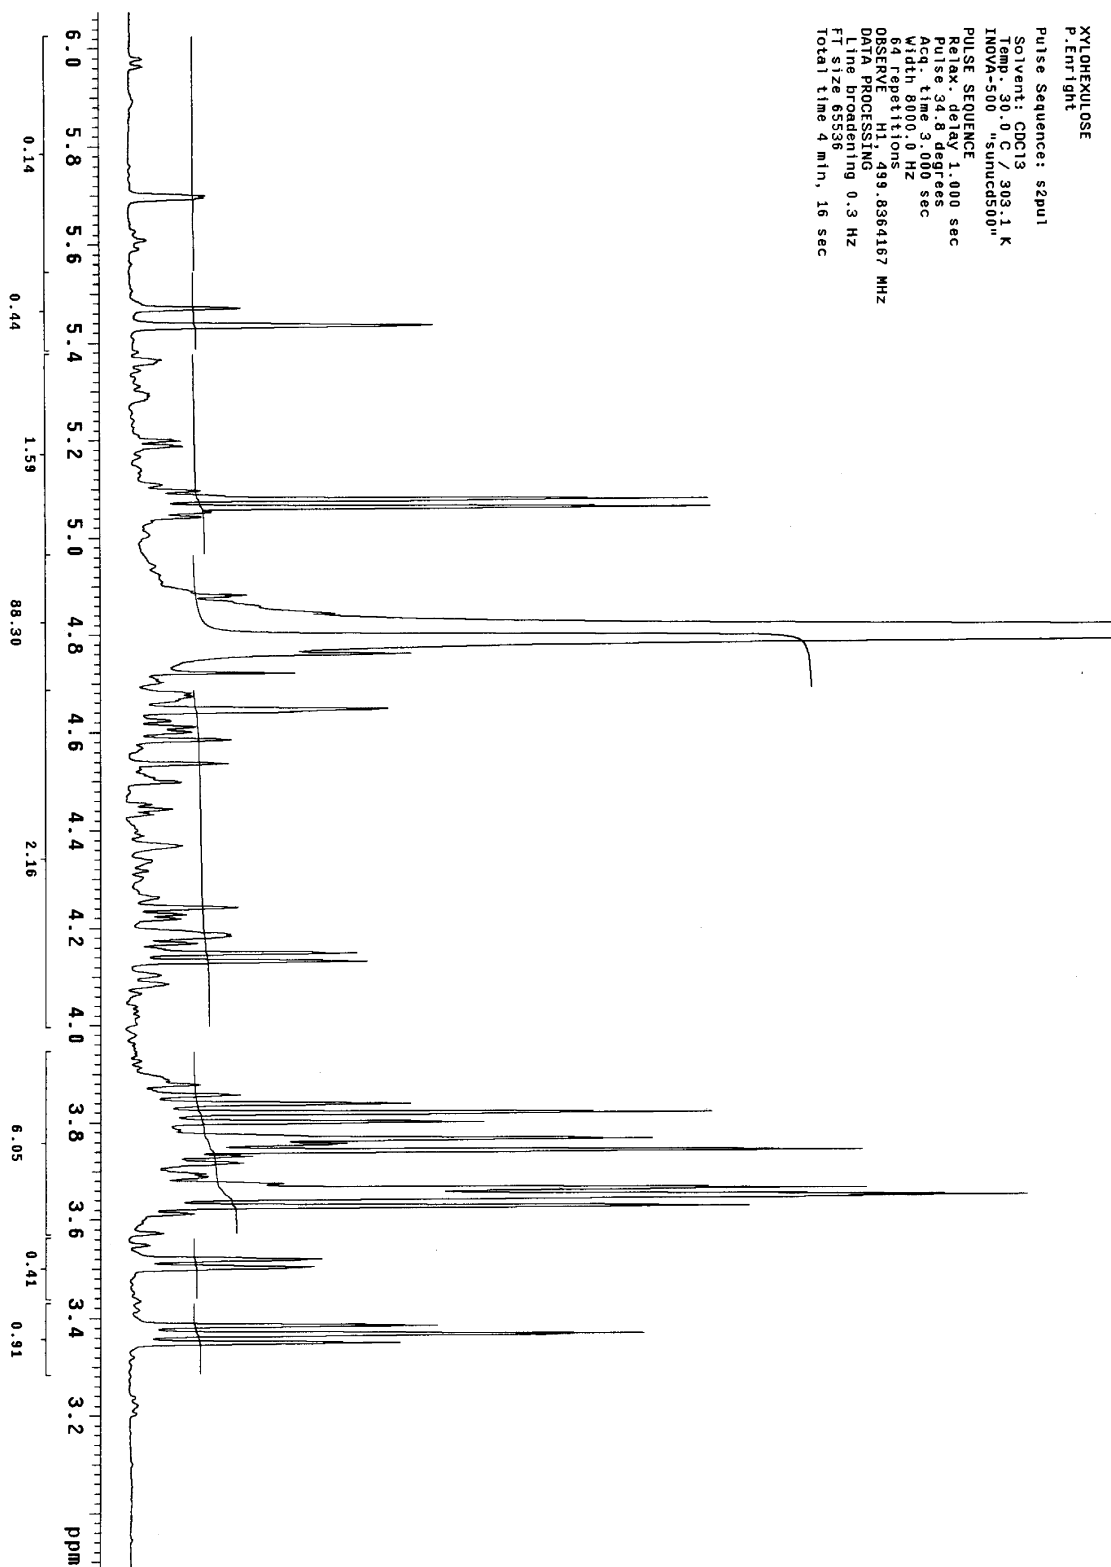

Supplement: Supplementary file 1 [file 5829327]
